# Supplementary material
Source: ML conference proceedings conference paper supplement (https://openreview.net/forum?id=4sDHLxKb1L)
Supplement: supplementary_material [file attachment]

## 378 6 Appendix

379 Our code is available at <https://anonymous.4open.science/r/HiBug-0EE7>.

### 380 6.1 Model repair by HiBug

381 We elaborate on the details of data selection methods and data generation methods of *HiBug*.

382 **Data selection.** Our data selection method aims to identify crucial data for model repair from the  
383 unlabeled data pool. To achieve effective repair, we require the selected samples to exhibit both high  
384 error rates and diversity.

385 To accomplish this objective, our first step is to identify data slices with high error rates. Given a  
386 predetermined budget and an unlabeled data pool, we assign each data point in the unlabeled pool to  
387 its respective data slice based on attribute values. However, a challenge arises because the labels for  
388 these data points are unavailable. Therefore, we turn to the validation set, which already possesses  
389 known labels. By leveraging the labels in the validation set, we can calculate the failures and the  
390 error rate associated with each data slice. This information allows us to estimate the error rates of the  
391 unlabeled data slices.

392 Once we have obtained the error rate for each slice, we rank all data slices according to their error  
393 rates and select those with high error rates. This process is carried out iteratively, starting with the  
394 data slice that exhibits the highest error rate. We accumulate the number of failures associated with  
395 the selected slices as the iterations progress. The iteration continues until the accumulated number of  
396 failures equals or exceeds a threshold defined by the hyper-parameter  $\beta$  multiplied by  $D_F$ . Here,  $\beta$   
397 represents the percentage of failures we aim to address, while  $D_F$  corresponds to the total number of  
398 failures observed in the validation set.

399 After identifying slices with high error rates, we distribute the budget among the data slices propor-  
400 tionally to the number of failures they encompass. This allocation ensures that data slices with a  
401 higher number of failures receive a larger share of the budget, while also considering the diversity  
402 factor. Finally, we select unlabeled data from each data slice based on the budget allocated to that  
403 particular slice. During this selection process, we prioritize data points with lower confidence to  
404 maximize the potential for model improvement. In our experiments, we set the hyper-parameter  $\beta$  to  
405 a fixed value of 0.9.

406 **Data generation.** *HiBug* can generate more related data (e.g., data with failure patterns) that can  
407 further improve the model performance. For data generation, we employ a straightforward approach.  
408 Firstly, we collect the attribute values of the top 200 data slices with the highest validation error rates  
409 for each label. Next, we construct a prompt that incorporates label name and attribute variables:

$$410 \text{ "A photo of } *1 *2 *label *3, \text{ in a } *4 \text{ background"} \quad (2)$$

410 During the data generation process, the variables  $*1$ ,  $*2$ ,  $*3$ ,  $*4$  are replaced by the values of attributes,  
411 such as "several" "black" "with a person" and "snow". The variable  $*label$  is substituted with the  
412 corresponding label name, such as "dog" or "cat."

413 We show the effectiveness of data generation with *HiBug* in ImageNet10. In this experiment, we  
414 generate a total of 10,000 data points, with 1,000 data points generated for each label. We down-  
415 sample the overall generated data to obtain results for 1,000 data points and 5,000 data points, as  
416 presented in Table 5. For comparison, we use a baseline method "Class name" that uses the following  
417 prompt, where the variable  $*label$  will be substituted with the corresponding label name during  
418 generation.

$$419 \text{ "A photo of } *label." \quad (3)$$

### 419 6.2 Introduction to the user interface

420 We offer a user interface for *HiBug* to facilitate more effective debugging. The user interface provides  
421 two primary functionalities. Firstly, users can easily view the distribution of attributes. For each  
422 attribute name, a histogram representing the various attribute values can be plotted, as demonstrated

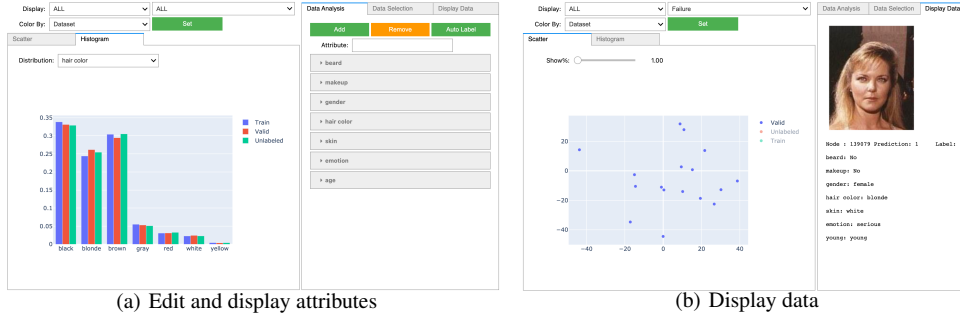

Figure 6: In (a), we show that users can view the distribution of attributes by histogram (left tab), and propose or edit attributes (right tab). In (b), we show that users can view the distribution of features by scatter plot (left tab), and attributes of a specific data point in the scatter (right tab).

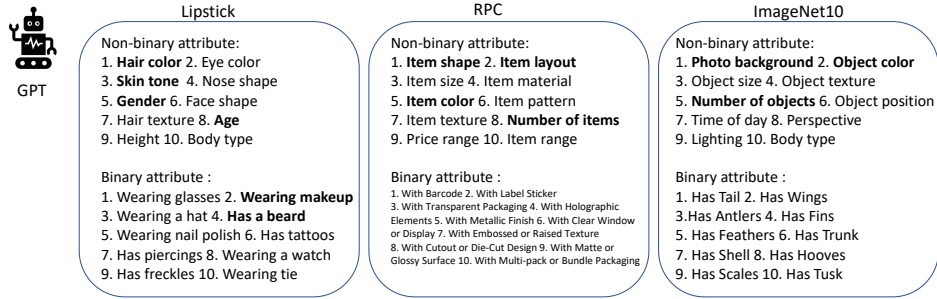

Figure 7: Attribute names proposed by chatGPT. The value of binary attributes are "yes" or "no".

in Figure 6(a). It's worth noting that we also provide additional flexibility by allowing users to input attribute names during the attribute proposal stage. This feature can be particularly useful when users are confident about specific tasks and seek to enhance the debugging process. Secondly, users can examine the data distributions in the embedding space. For example, we can display and analyze specific failures, as depicted in Figure 6(b).

### 6.3 Experiment details

**chatGPT attribute proposal.** Figure 7 shows the attribute names proposed by chatGPT in the three experiment settings discussed in the main paper. We also provide additional flexibility by allowing users to select attribute names for HiBug to explore. We highlight the attributes selected for our experiments.

**HiBug's bug discovery outputs.** Figure 8 showcases the bug discovery outputs obtained by HiBug in the three experiment settings outlined in the main paper. These outputs demonstrate the effectiveness of HiBug in identifying bugs and providing valuable insights to the user.

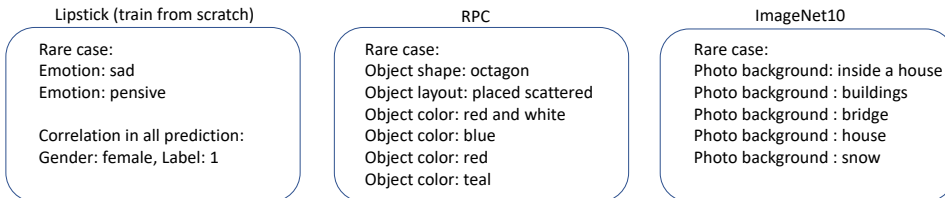

Figure 8: HiBug's bug discovery outputs on three experiment settings.

Table 6: Given the same attribute list for each data, HiBug can discover more error slices with a larger validation set.

| Size of validation set | 15k | 10k | 5k  | 1k | 0.5k |
|------------------------|-----|-----|-----|----|------|
| Number of error slices | 288 | 238 | 168 | 71 | 49   |

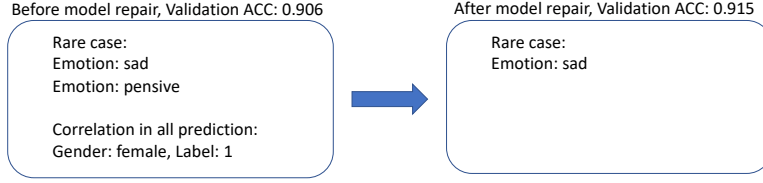

Figure 9: HiBug ’s outputs before and after repair.

#### 6.4 Further ablation studies

**Size of the validation set.** We conducted additional ablation studies to explore the impact of the validation set size on HiBug ’s performance. To quantify the error slices, we define them as data slices with validation performance lower than or equal to the overall validation performance. As presented in Table 6, we observed that HiBug can discover a greater number of error slices when the validation set size is larger. This phenomenon can be attributed to the larger dataset covering a broader range of attribute values, leading to the identification of a higher number of error slices by HiBug .

**Do bugs fixed after model repair?** In the lipstick experiment, the model’s predictions are correlated with the gender of the person in the data. This correlation is detected in the bug discovery process of *HiBug*. For comparison, we use HiBug to test the model after repairing by data selection. The result is presented in Figure 9. We observe that most bugs discovered before repair disappear. This confirms again that our model repair strategy is effective.
